# Supplementary material for: Poly(9,9′-spirobifluorene-manganese porphyrin): a new catalytic material for oxidation of alkenes by iodobenzene diacetate and iodosylbenzeneElectronic supplementary information (ESI) available: methods for synthesis of all compounds, physical data and detailed procedures for the catalytic oxidations. See http://www.rsc.org/suppdata/cc/b3/b301717f/
Source: Royal Society of Chemistry journal article supplement (doi:10.1039/b301717f), 2003-04-02
Supplement: b301717f.doc [file b301717f.doc]

# Supplementary data

**Poly (9,9’-spirobifluorene-manganese porphyrin): a new catalytic material for oxidation of alkenes by iodosylbenzene and iodobenzene diacetate**

**Cyril Poriela, Yann Ferranda, Paul Le Mauxa, Joëlle Rault-Berthelotb* and Gérard Simonneauxa**[[1]](#footnote-2)*

lLaboratoire de Chimie Organométallique et Biologique, UMR CNRS 6509 and bLaboratoire de Synthèse et électrosynthèse organiques, UMR CNRS 6510, Université de Rennes 1, 35042 Rennes cedex, France.

**General Experiments:** All reactions were performed under argon and were magnetically stirred. Solvents were distilled from appropriate drying agent prior to use: Et2O and THF from sodium and benzophenone, toluene from sodium, CH2Cl2 from CaH2, CHCl3 from P2O5 and all other solvents were HPLC grade. Commercially available reagents were used without further purification unless otherwise stated. All reactions were monitored by TLC with Merck pre-coated aluminium foil sheets (Silica gel 60 with fluorescent indicator UV254). Compounds were visualized with UV light at 254 nm and 365 nm. Column chromatography was carried out using silica gel from Merck (0.063-0.200 mm). 1H NMR and 13C NMR in CDCl3 and Toluene d8 were recorded using Bruker (Advance 500dpx and 300dpx spectrometers) at 500 MHz and 75 MHz respectively. High-resolution mass spectra were recorded on a ZabSpec TOF Micromass spectrometer in FAB mode or ESI positif mode at the CRMPO.

All electrochemical experiments were performed using a Pt disk electrode (diameter 1mm), the counter electrode was a vitreous carbon rod and the reference electrode was a silver wire in a 0.1M AgNO3 solution in CH3CN. Ferrocene was added to the electrolyte solution at the end of a series of experiments. The ferrocene/ferrocenium (Fc/Fc+) couple served as internal standard and all reported potentials are referenced to its reversible formal potential. Ac­tivated Al2O3 was added in the electrolytic so­lu­tion to remove excess moisture. The three electrodes cell was connected to a PAR Model 173 potentiostat monitored with a PAR Model 175 signal generator and a PAR Model 179 signal coulometer. The cyclic voltammetry traces (CVs) were recorded on an XY SEFRAM-type TGM 164.

Acetonitrile with less than 5‰ of water (ref.SDS00610S21) and dichloromethane with less than 100 ppm of water (ref. SDS 02910E21) were used without purification. Tetrabutylammonium hexafluorophosphate from FLUKA was used without any purification. Aluminium oxide was obtained from Woëlm, activated by heating at 300°C under vacuum for 12h and used at once under argon pressure.

Liquid UV-visible spectra were recorded on a UVIKON XL from Biotech. Solid UV-visible spectra were recorded using a Guided Wave model 150 spectrophotometer with optical fibres; a concave platinum surface acts as a reflector for the optical beam.

Melting points were measured on a system KOFLER type WME HEIZBANK.

All catalytic reactions were controlled on a Varian CP-3380 Gas Chromatograph equipped with a CP-Chirasil-Dex Column.

Scanning Electron Microscopy was performed on JEOL JSM 301F.

Electronic Microanalysis were performed on JEOL JSM 6400 using an Energy Dispersive spectrometry (EDS) detector Oxford-Link Isis.

9,9'-spirobi[fluorene]-2-carbaldehyde

To a solution of 9,9’-spirobifluorene (12.7 mmol) in 100 mL of distilled and degassed dichloromethane, cooled at 0°C, is added α,α-dichloro-methyl-methylether (31,6 mmol) in one portion. After five minutes titanium tetrachloride (31.6 mmol in 50 mL dichloromethane)is added drop wise over a period of 45 minutes. The dark green solution is then stirred at room temperature for 75 minutes and 250 g of ice is then added and let under vigorous stir for 30 minutes.

The two layers are then separated and the aqueous layer is extracted two times with 100 mL of dichloromethane. The organic layers are then washed with a saturated solution of sodium bicarbonate, sodium chloride, water and dried on magnesium sulphate. The solvents are removed under vacuum and the crude product is chromatographied on silica gel (CHCl3/Pentane: 6/4).

**Yield:** 70 %

**UV-VIS (CH2Cl2):**  max/nm (log ): 328 (4.08), 303 (4.38), 292 (4.32), 282 (4.31), 225 (4.59).

**Mass (FAB) (m/z):** calculated for C26H16 O (M.+): 344,1201 found: 344,1199

**1 H NMR (500Mhz, CDCl3): **6.74 (H1’, ddd, 2H), 6.82 (H8, ddd, 1H), 7.14 (H2’, td, 2H), 7.22 (H7, td, 1H), 7.30 (H1, sdd, 1H), 7.43 (H3’, td, 2H), 7.47 (H6, td, 1H), 7.91 (H4’, ddd, 2H), 7.94 (H3, dd, 1H), 7.96 (H5, ddd, 1H), 8.04 (H4, dd, 1H), 9.84 (CHO, s, 1H).


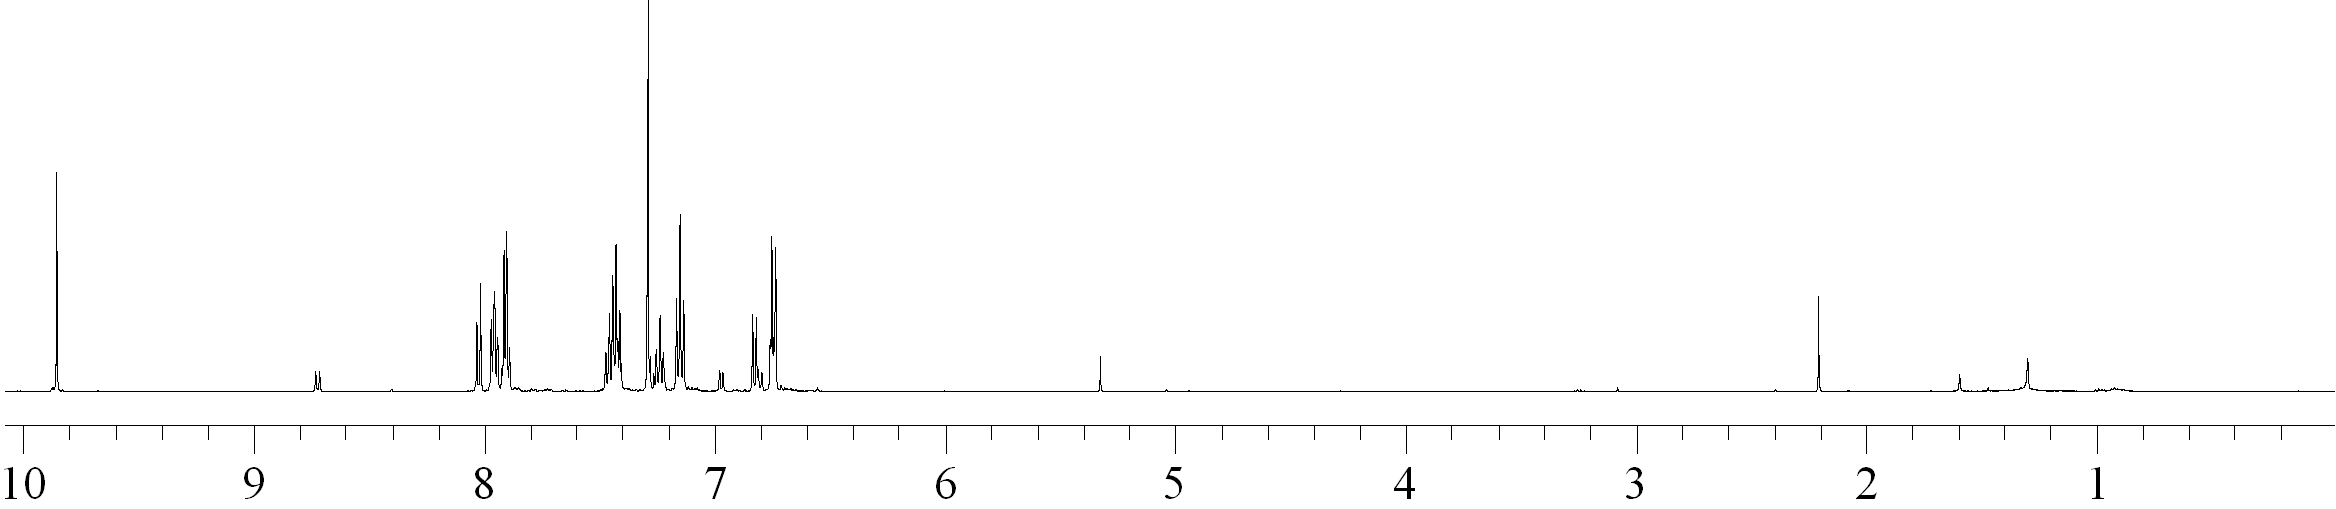


**13C NMR (75Mhz, CDCl3):**  65,6 (C9); 120,2; 120,3; 121,1; 123,8; 124,3; 124,5; 125,2; 127,9; 128; 129,5; 130,2; 135,9; 140,1; 141,8; 147,4; 147,8; 149,7; 150 (aromatic C); 191,6 (C=O)


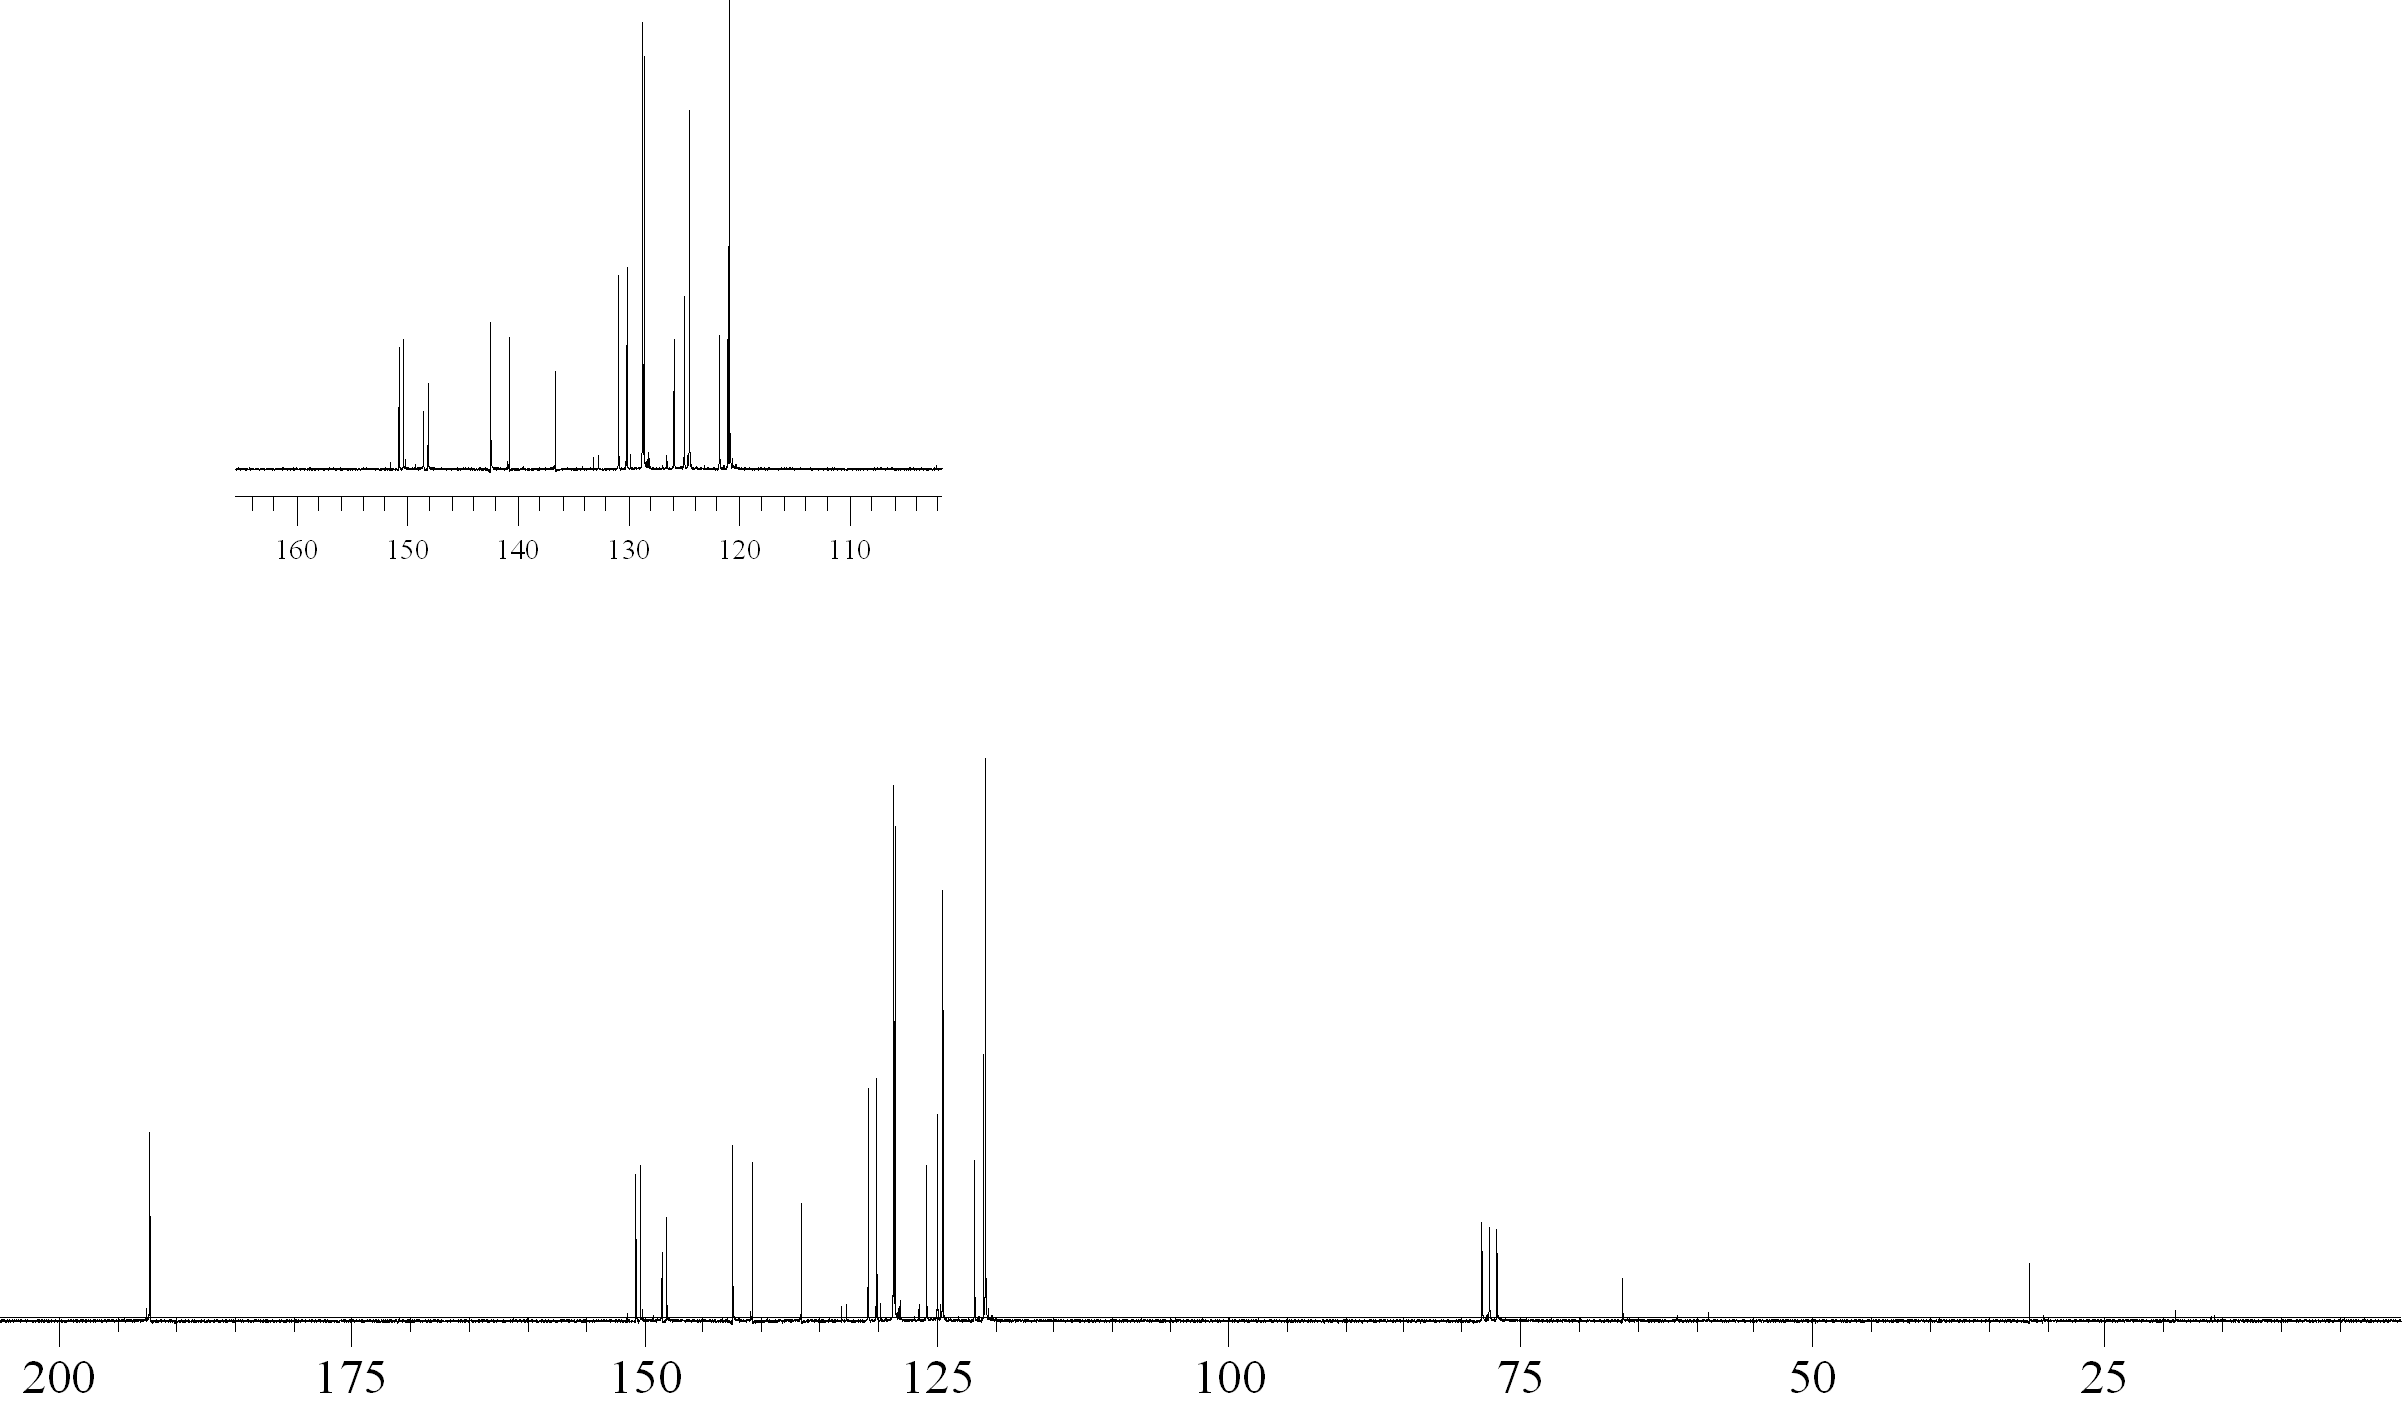


**Mp :** 209°C

**CV (CH2Cl2 0.2M/ Bu4NPF6, Fc/Fc+) : 1.34, 1.66.**

**
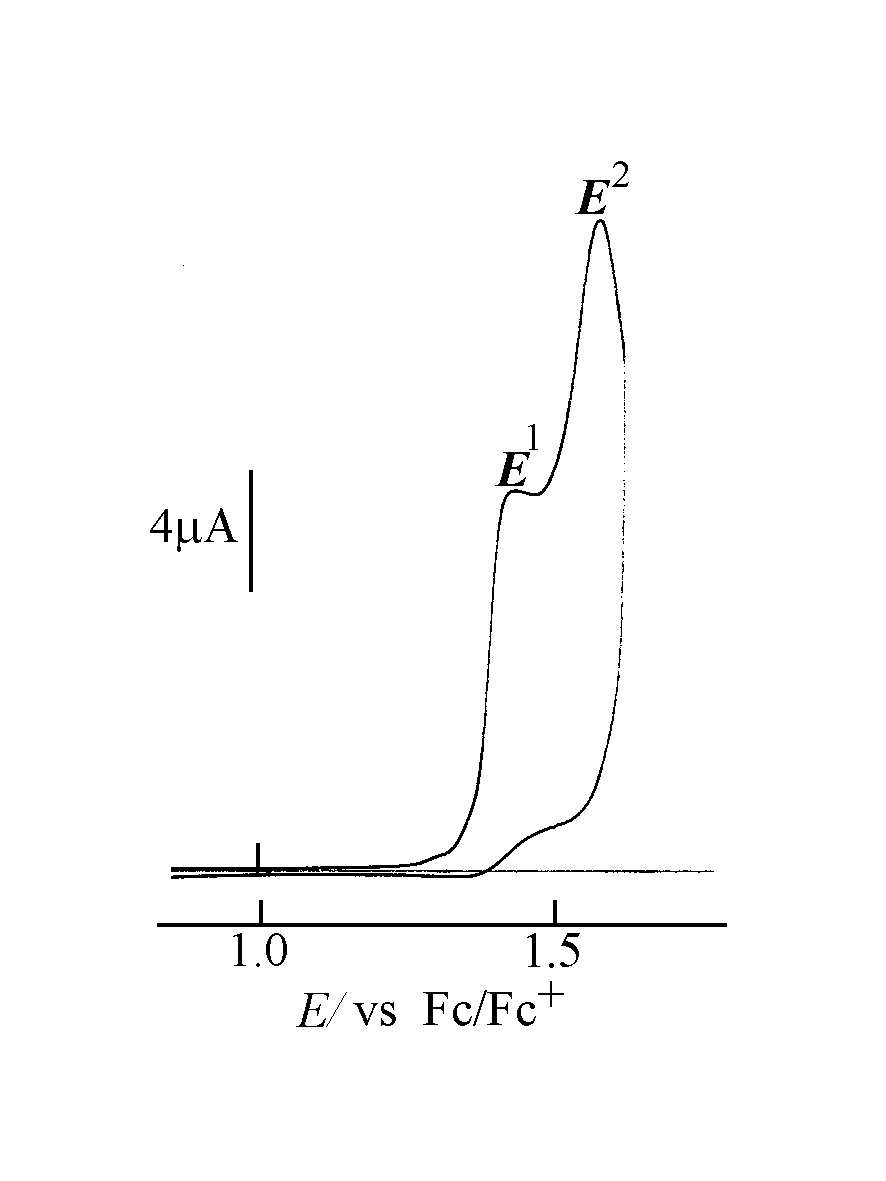
**

Pyrrole (7.5 mmol) and 9,9'-spirobi[fluorene]-2-carbaldehyde (7.5 mmol) are allowed to react at room temperature in dry and degassed dichloromethane (750 mL) under an argon atmosphere and protected from light with trace acid catalysis (BF3(OEt)2 48%: 0.75 mmol). Under these conditions the reaction reaches equilibrium in about 3 hours. A stoichiometric amount of p-chloranil is added to irreversibly oxidize the tetra-spiroporphyrinogene. After addition of several drops of triethylamine and the ordinary work-up, concentration, washing, drying, the crude reaction mixture is chromatographied twice on silica gel (first: dichloromethane; second: cyclohexane/ dichloromethane: 1/3) to afford a purple powder of *meso*-Tetrakis 5,10,15,20-(spirobifluoren-2-yl) porphyrin.

**Yield :** 40 %

**UV-VIS (CH2Cl2):**  max/nm (log ): 652 (3.44), 594 (3.42), 556 (3.84), 520 (3.98), 427 (5.39), 342 (4.07) 309 (4.53), 297 (4.50), 228 (5.21).

**
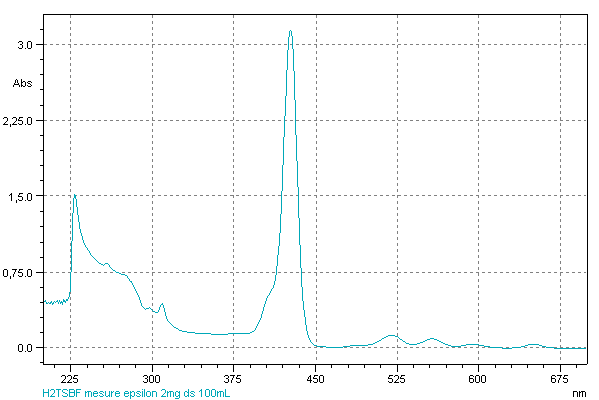
**

**Mass (FAB) (m/z):** calculated for C120 H71 N4 (M+H)+: 1567.5634 found: 1567.5600

**1H NMR (500MHz, CDCl3):**  8.57 (*H  pyrrole*, s, 4H), 8.55 (*H  pyrrole*, s, 4H), 8.15-8.07 (m, 12H), 7.75-7.69 (m, 8H), 7.53- 7.42 (m, 8H), 7.34-7.32 (m, 9H), 7.27-7.18 (m, 11H), 7.09-7.05 (m, 8H), 6.88 (d, 4H), -3.13 (s, 2H, NH).


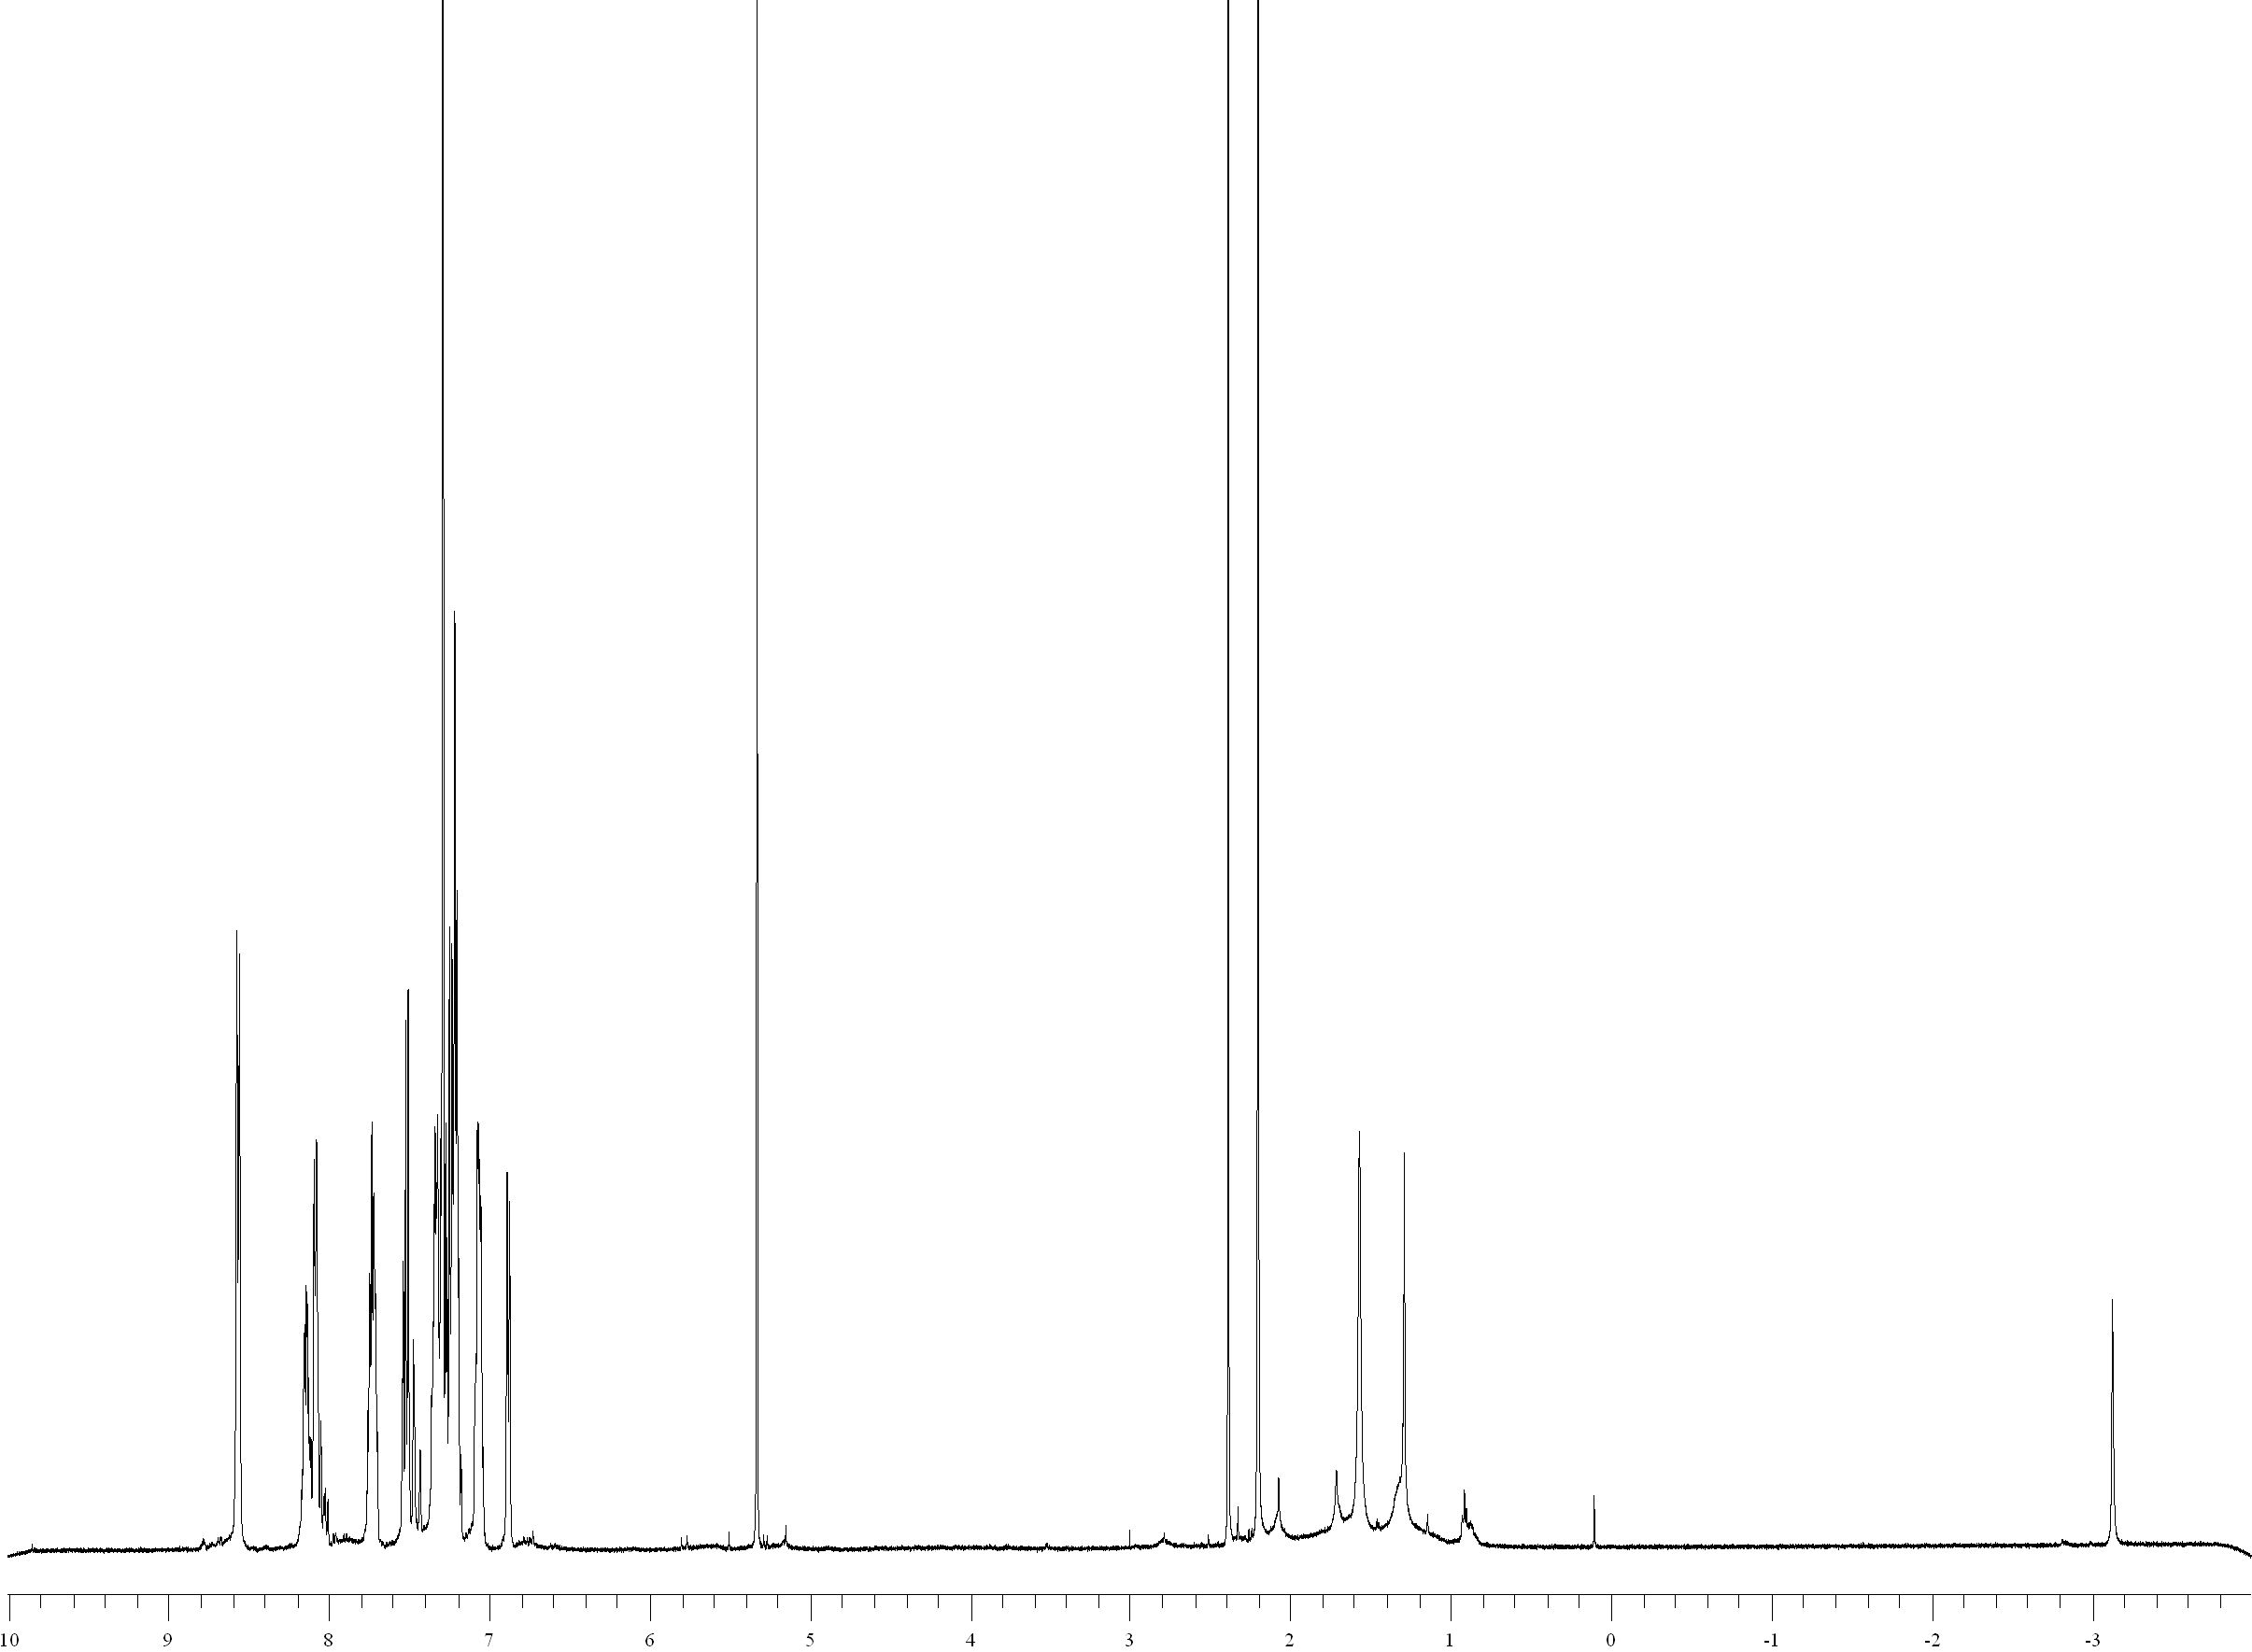


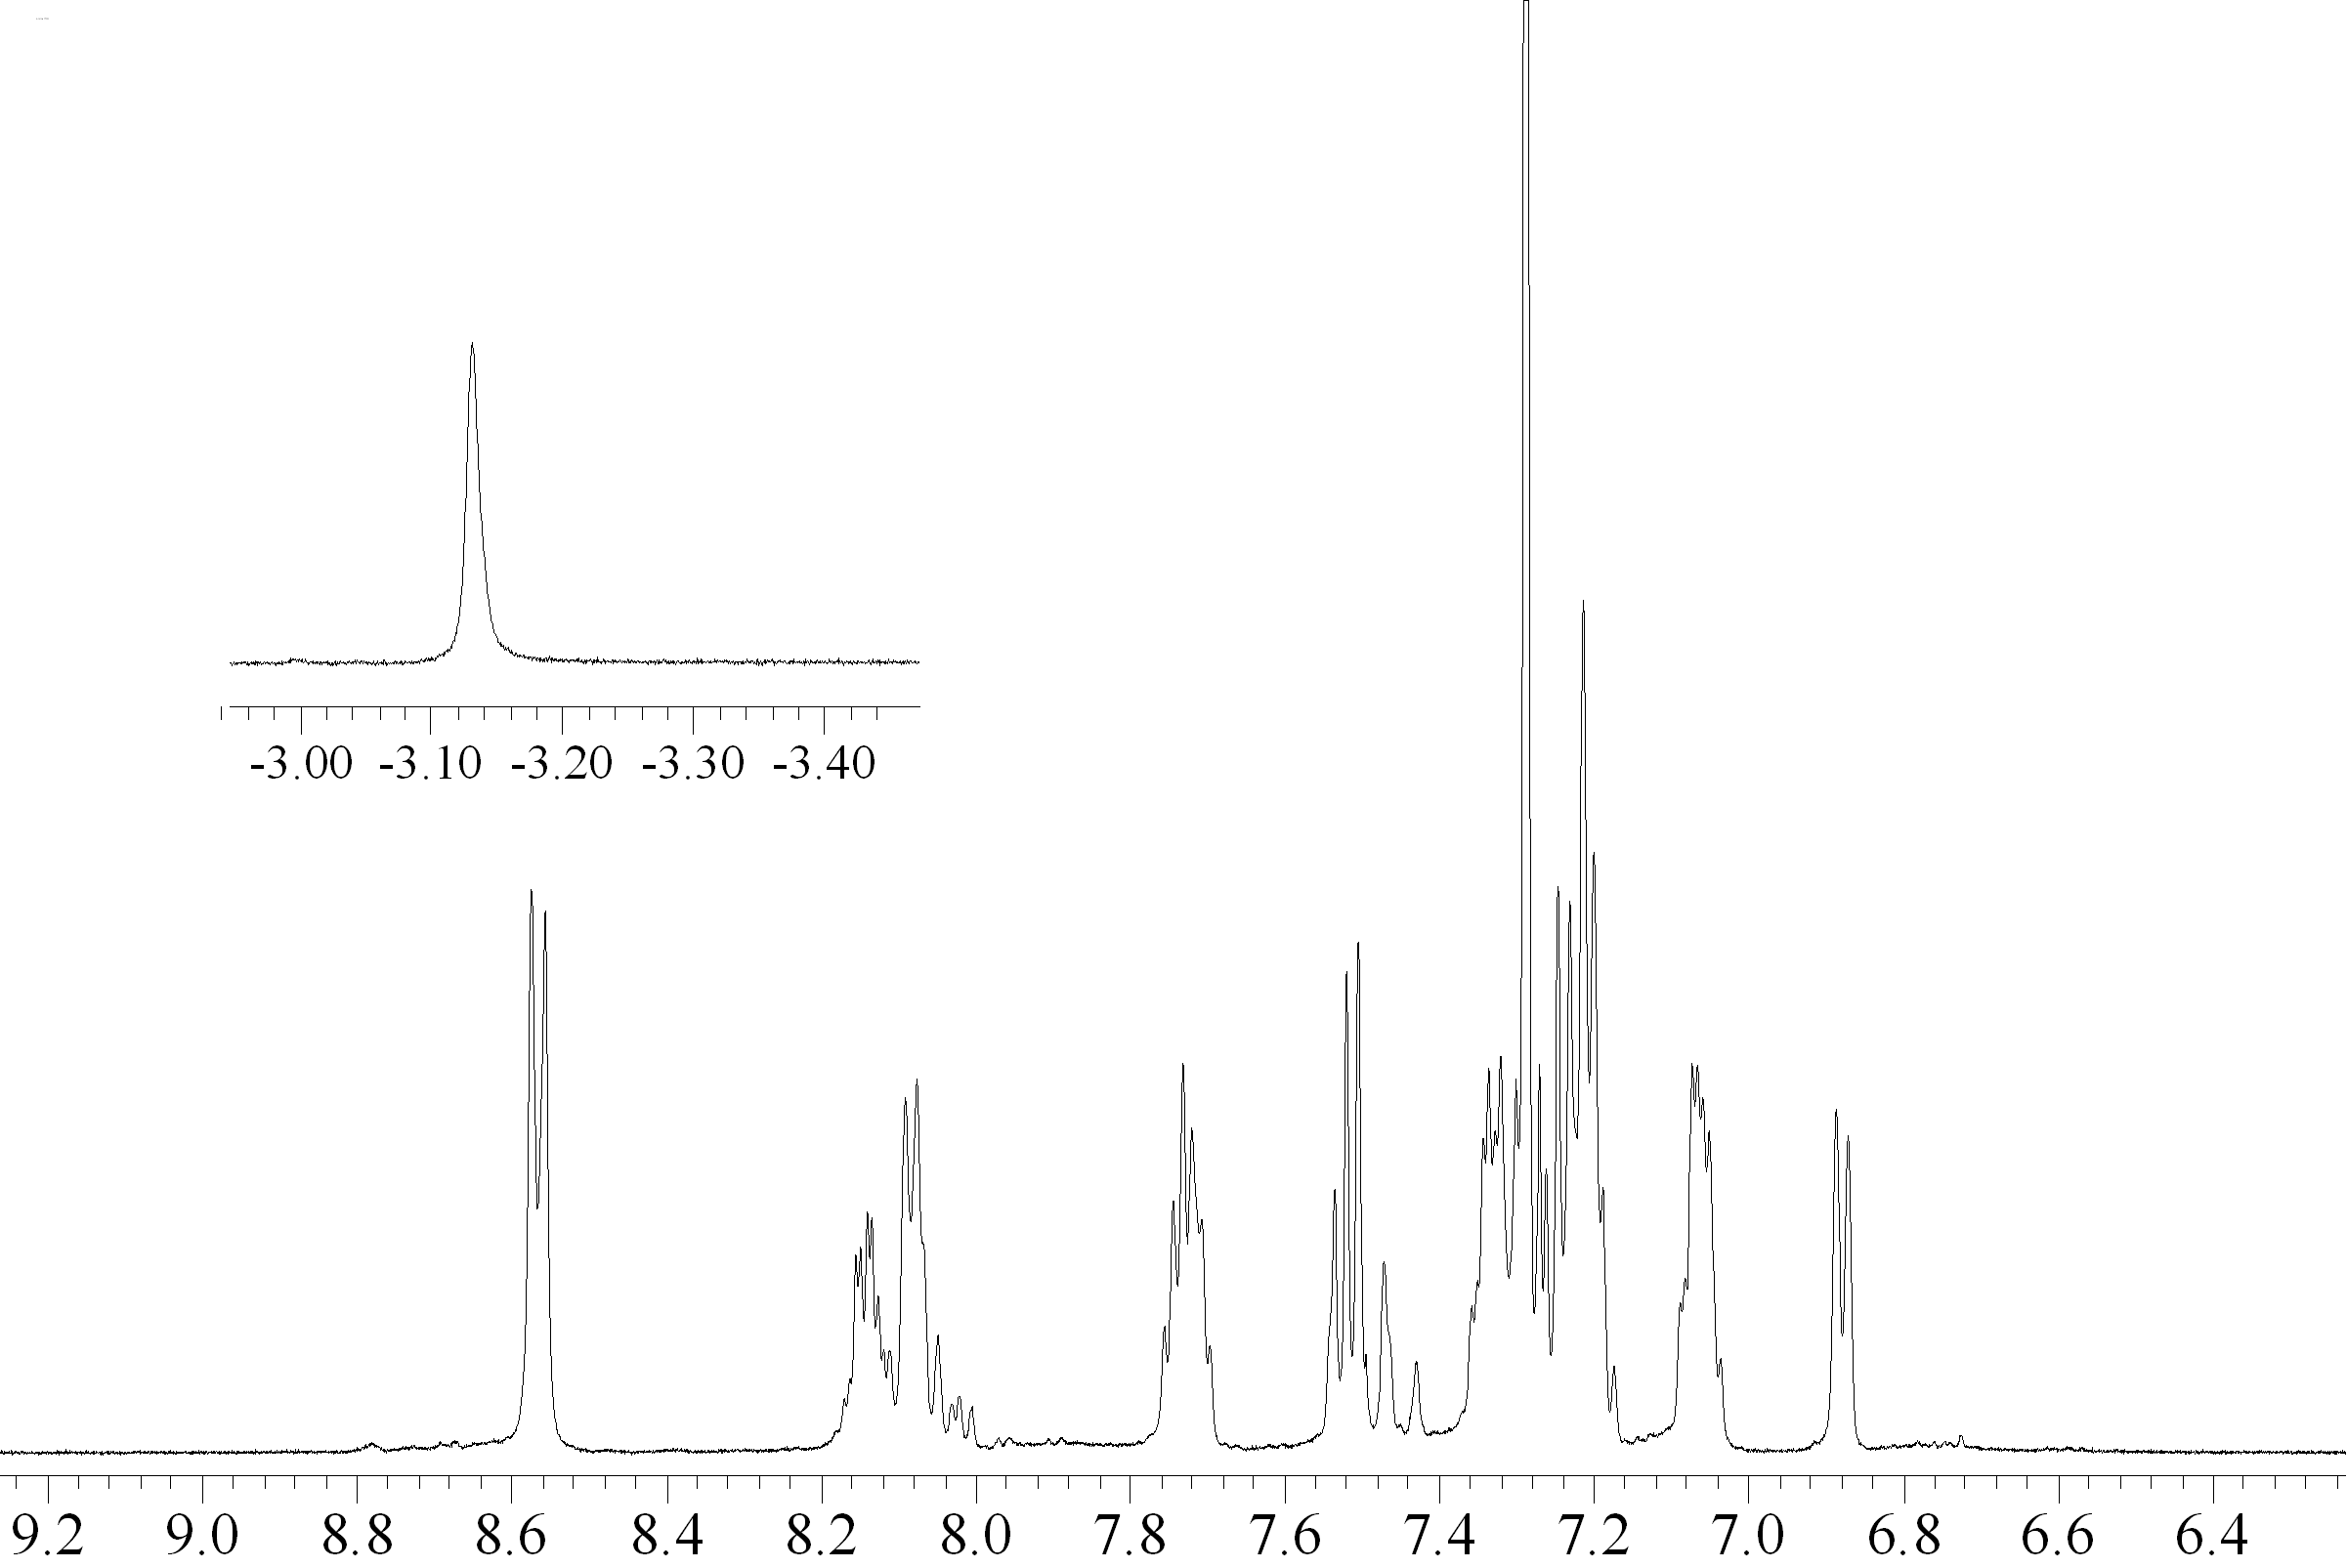


**CV (CH2Cl2 0.2M/ Bu4NPF6, Fc/Fc+):** 0.585, 0.915, 1.395 (shoulder), 1.505

**
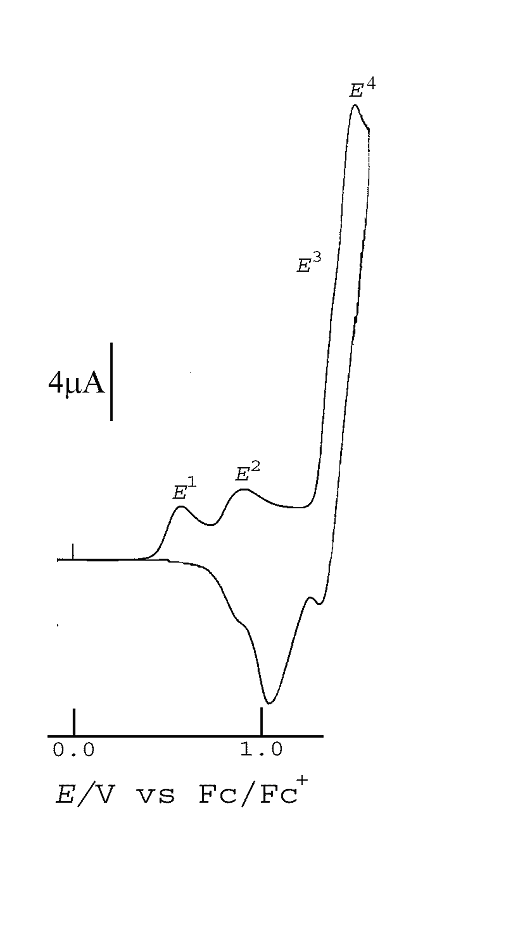
**

To a solution of (TSP)H2 (191 mmol) dissolved in distilled and degassed chloroform is added several drops of 2,6 lutidine, anhydrous MnCl2 (2.68 mol) and dry methanol. The mixture is stirred under an argon atmosphere for 34 hours until the reaction is completed. The solvent is removed under vacuum, one drop of concentrated hydrochloric acid is added and the crude product is chromatographied on silica gel using a mixture of pentane/dichloromethane (1/1), dichloromethane and dichloromethane/methanol (7/1). The major green band is collected and dried under vacuum to afford a green powder of *meso*-Tetrakis 5,10,15,20(spirobifluoren-2-yl) porphyrinato Manganese chloride.

**Yield:** 85 %

**UV-VIS (CH2Cl2):**  max/nm (log ): 625 (4.11), 587 (3.92), 481 (5.04), 407 (4.67), 382 (4.67), 336 (4.63), 309 (4.79), 297 (4.74), 228 (5.21).

**Mass (ESI, CH2Cl2/MeOH 9/1) (m/z):** calculated for C120 H68 N4 Mn (M-Cl)+: 1620.4858 found: 1620.4874

**CV (CH2Cl2 0.2M/ Bu4NPF6, Fc/Fc+):** 0.66, 1.18, 1.33


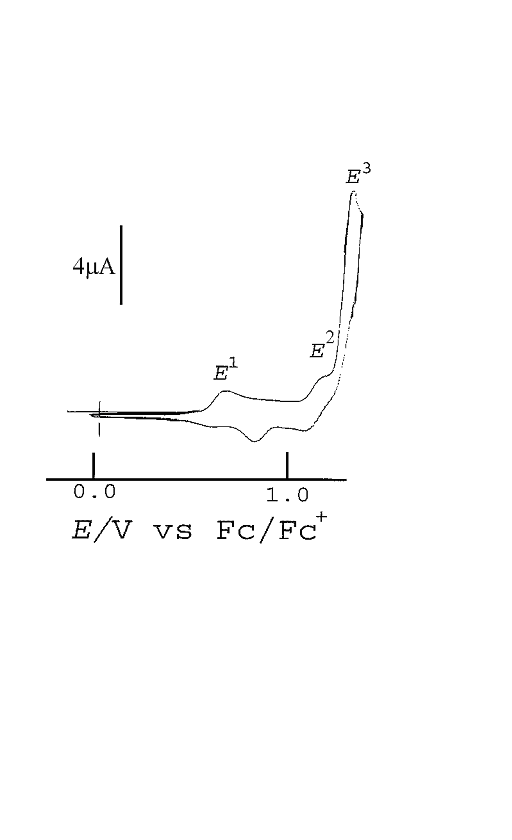


Catalytic procedure:

Two different catalytic conditions were used depending on the nature of the oxidant: iodobenzene diacetate (condition A) or iodosylbenzene (condition B). These different catalytic conditions are described below and also in the experimental part.

Condition A: Using an excess of alkene (10 equivalents versus iodobenzenediacetate): addition of iodobenzenediacetate (100 equivalents relative to catalyst) and 10 L of water to a mixture of (P)MnCl/imidazole/alkene (1/10/1000) in dichloromethane/acetonitrile (2:1) under anaerobic conditions. Time reaction is 90 minutes for both **poly (1)** and **1.**

Conditions B: Using an excess of alkene (10 equivalents versus iodosylbenzene): addition of iodosylbenzene (100 equivalents relative to catalyst) to a mixture of (P)MnCl/imidazole/alkene (1/10/1000) in dichloromethane under anaerobic conditions. Time reaction is 90 minutes for **1** and3hours for **poly (1).**

The contents of (TSP)MnCl in **poly(1)** were calculated from the Mn contents in the heterogen catalysts determined by scanning electron microscopy and electronic microanalysis.

- (TSP) MnIII(Cl)

Iodosylbenzene oxidation:

To a solution 1mM of (TSP)MnIII(Cl) (1mol) in dichloromethane (1 mL) is added imidazole (10 mol), alkene (1000 mol) and iodosylbenzene (100 mol). The mixture is stirred under an argon atmosphere for 90 minutes. The alkene epoxidation reaction is monitored by gas chromatography.

Iodobenzene diacetate oxidation:

To a solution 1mM of (TSP)MnIII(Cl) (1mol) in dichloromethane (0.66 mL) and acetonitrile (0.33 mL) is added imidazole (10 mol), alkene (1000 mol), iodobenzene diacetate (100 mol) and 10 L of water. The mixture is stirred under an argon atmosphere for 90 minutes. The alkene epoxidation reaction is monitored by gas chromatography.

- Poly (1)

After scratching the film out of the electrode, the polymer was crushed to obtain a fine powder which is stored under nitrogen. The material was used without any further treatment for all catalytic experiments.

Iodosylbenzene oxidation:

To a mixture of Poly (1) (3mg) in dichloromethane (1mL) is added imidazole (10 mol) and the reaction is stirred under an argon atmosphere for 15 minutes. Alkene (1000 mol) and iodosylbenzene (100 mol) are then added and the mixture is stirred for 3 hours. The alkene epoxidation reaction is monitored by gas chromatography. The mixture is then filtered and the residue is washed several times by dichloromethane, dimethylformamide, water and acetone. The polymer is dried under vacuum and used for another run in the same experimental conditions.

Iodobenzene diacetate oxidation:

To a mixture of Poly (1) (3 mg) in dichloromethane (0.66 mL) and acetonitrile (0.33 mL) is added imidazole (10 mol), and the reaction is stirred under an argon atmosphere for 15 minutes. Alkene (1000 mol), iodobenzene diacetate (100 mol) and 10 L of water are then added and the mixture is stirred for 90 minutes. The alkene epoxidation reaction is monitored by gas chromatography. The mixture is then filtered and the residue is washed several times by dichloromethane, water and acetone. The polymer is dried under vacuum and used for another run in the same experimental conditions.

# Scanning Electron Microscopy on Poly (1)

**
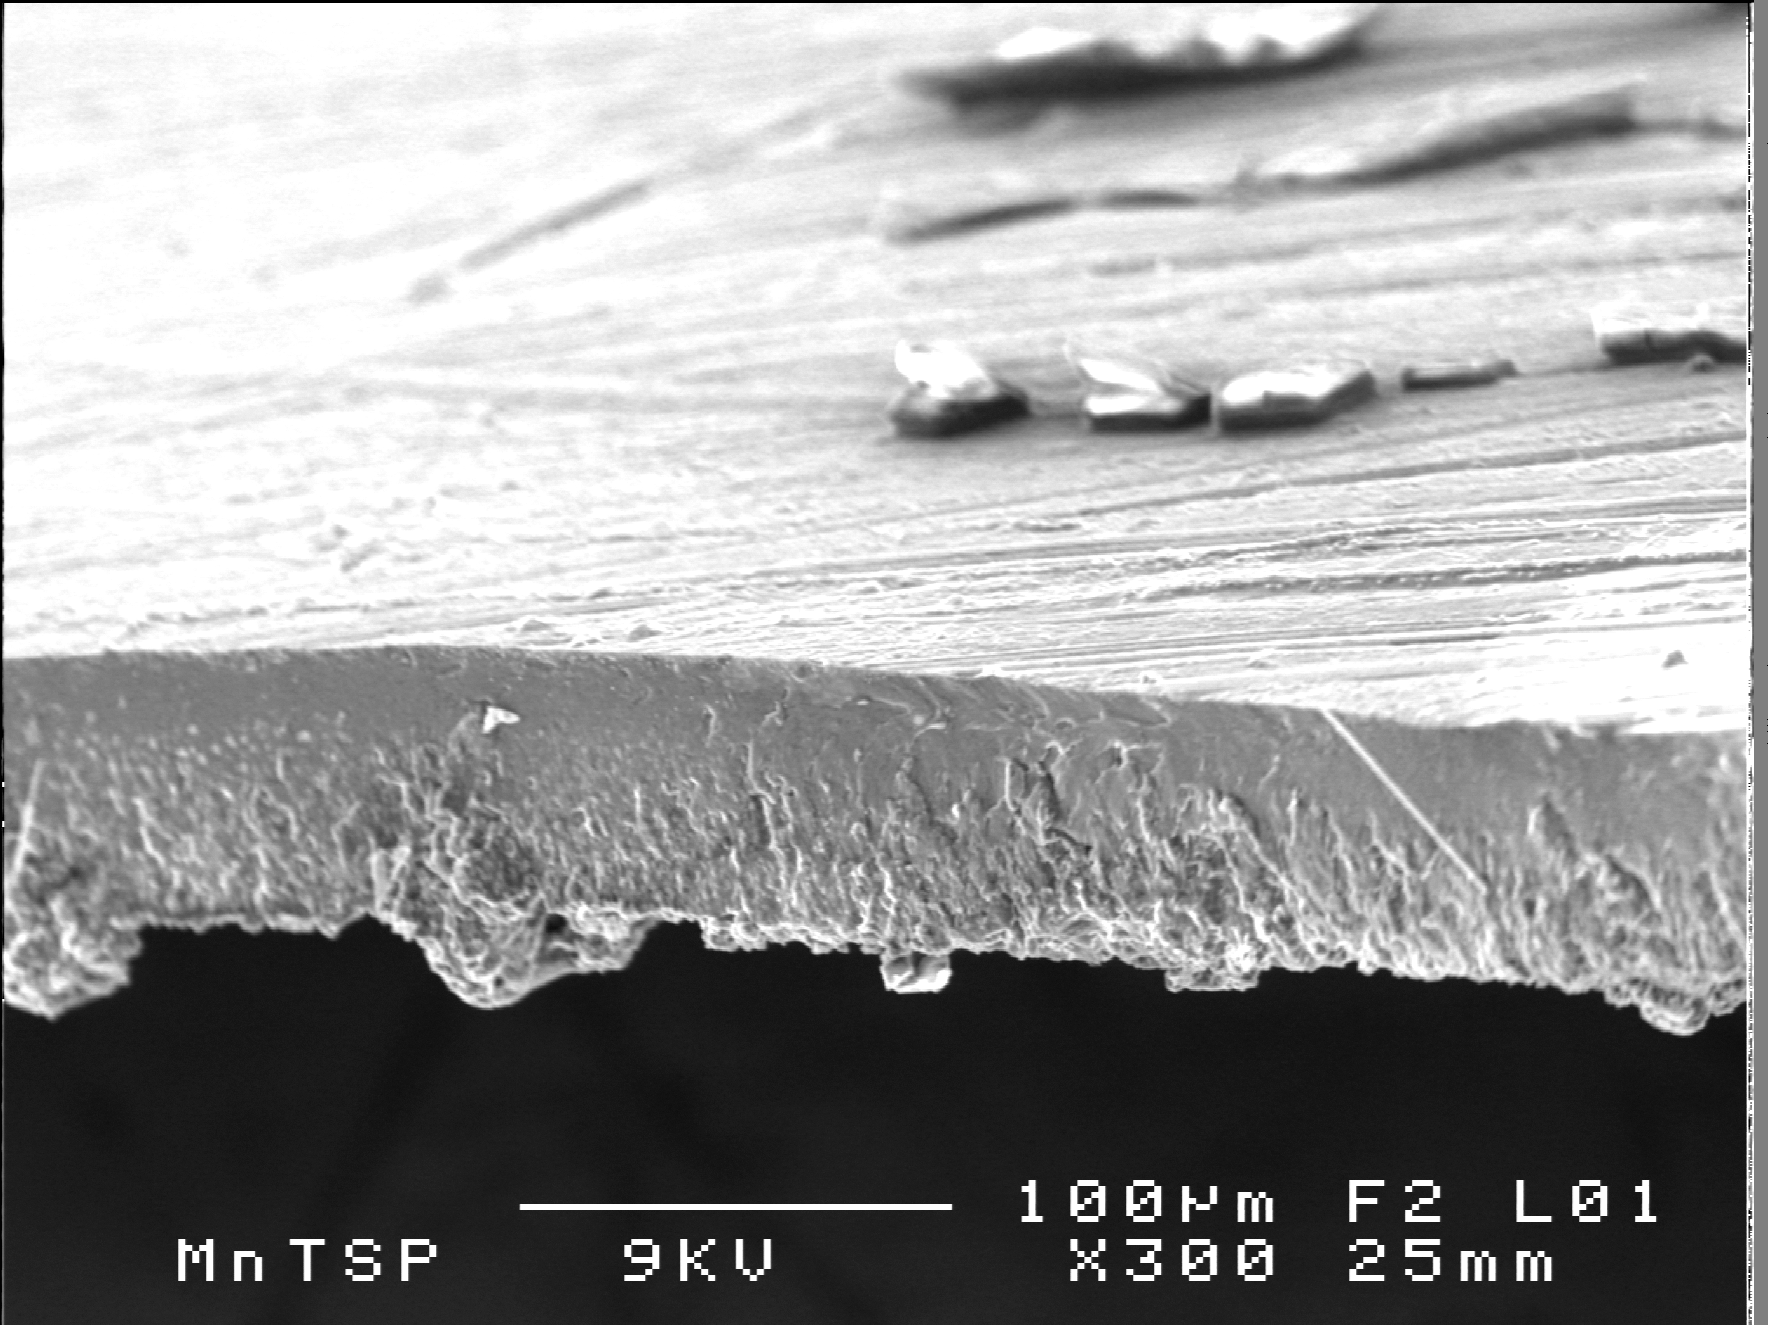
**

**Side view of poly (1) (x1000)**

**Side view of poly (1) (x300)**

1. * [↑](#footnote-ref-2)
